# Supplementary material
Source: HighWire-hosted journal article supplement (https://www.rcpjournals.org/highwire/filestream/12490/field_highwire_adjunct_files/3/Dasgupta_supplementary_material_S4.pdf)
Supplement: Dasgupta_supplementary_material_S4.pdf [file Dasgupta_supplementary_material_S4.pdf]

**Patient demographics in both pre- and post-MUO/CUP service cohorts.**

| Patient Demographics     |                                                      |                                                      |
|--------------------------|------------------------------------------------------|------------------------------------------------------|
| Age at Diagnosis (Years) | Number of Patients<br>Pre MUO/CUP Service<br>(N= 32) | Number of Patients<br>Post MUO/CUP Service<br>(N=42) |
| <i>Mean</i>              | 72.1 ± 9.3                                           | 72.0 ± 12.4                                          |
| <i>Median</i>            | 71.5                                                 | 75.5                                                 |
| 40-49                    | 1 (3.13%)                                            | 3 (7.14%)                                            |
| 50-59                    | 1 (3.13%)                                            | 4 (9.52%)                                            |
| 60-69                    | 10 (31.25%)                                          | 8 (19.05%)                                           |
| 70-79                    | 14 (43.75%)                                          | 15 (35.71%)                                          |
| 80-89                    | 5 (15.63%)                                           | 12 (28.57%)                                          |
| 90-99                    | 1 (3.13%)                                            | 0 (0%)                                               |
| Sex                      | Number of Patients<br>Pre MUO/CUP Service<br>(N= 32) | Number of Patients<br>Post MUO/CUP Service<br>(N=42) |
| Male                     | 18 (56.25%)                                          | 25 (59.52%)                                          |
| Female                   | 14 (43.75%)                                          | 17 (40.48%)                                          |
| Performance Status       | Number of Patients<br>Pre MUO/CUP Service<br>(N= 32) | Number of Patients<br>Post MUO/CUP Service<br>(N=42) |
| 0                        | 0 (0%)                                               | 3 (7.14%)                                            |
| 1                        | 1 (3.13%)                                            | 7 (16.67%)                                           |
| 2                        | 4 (12.5%)                                            | 6 (14.29%)                                           |
| 3                        | 1 (3.13%)                                            | 10 (23.81%)                                          |
| 4                        | 0 (0%)                                               | 9 (21.43%)                                           |
| Unknown                  | 26 (81.25%)                                          | 7 (16.67%)                                           |
